# Supplementary material for: Motor Development in Children with Cerebral Palsy in Sweden—A Population-Based Longitudinal Register Study
Source: MDPI journal article supplement (doi:10.3390/children10121864), 2023-11-28
Supplement: s1 [file s1]

Table S1. Comparisons of two models for longitudinal analysis.

Comparison of Akaike Information Criterion (AIC) between Stable Limit (SL) model and Peak and Decline (PD) model and presentation of SL model with respect to Gross Motor Function Classification System (GMFCS).

|          | <b>GMFCS</b>               | <b>I</b><br>n <sup>a</sup> =1060 | <b>II</b><br>n <sup>a</sup> =346 | <b>III</b><br>n <sup>a</sup> =209 | <b>IV</b><br>n <sup>a</sup> =292 | <b>V</b><br>n <sup>a</sup> =231 |
|----------|----------------------------|----------------------------------|----------------------------------|-----------------------------------|----------------------------------|---------------------------------|
|          | Mean n observations/child  | 2,6                              | 2,9                              | 2,8                               | 2,6                              | 2,0                             |
| AIC      | SL model                   | 18198*                           | 6585*                            | 3534*                             | 4714*                            | 3040*                           |
|          | PD model                   | 19457                            | 7202                             | 3783                              | 5300                             | 3729                            |
| SL model | GMFM-66 limit (95% CI)     | 88,1 (87,3–88,9)                 | 71,3 (70,2–72,4)                 | 54,3 (53,3–55,3)                  | 38,5 (37,5–39,5)                 | 17,9 (16,8–19,1)                |
|          | Age <sup>90</sup> (95% CI) | 4,5 (4,4–4,6)                    | 4,2 (3,9–4,4)                    | 3,1 (2,9–3,3)                     | 2,6 (2,4–2,8)                    | 0,9 (0,7–1,0)                   |
|          | Residual SD                | 4,0                              | 4,6                              | 2,8                               | 3,2                              | 3,9                             |

n<sup>a</sup>= Total number of children

\*= Lower AIC for SL model in comparison to PD model which gives SL model better fit

Age<sup>90</sup>= The average age when children reach 90% of their expected GMFM-66 limit
